# Supplementary material for: Relationship among oral health status, bolus formation and food comfortability during consumption of model cheeses in elderly
Source: Royal Society of Chemistry journal article supplement (doi:10.1039/d1fo00767j), 2021-01-01
Supplement: d1fo00767j1.pdf [file d1fo00767j1.pdf]

*Table S1: Composition, main processing condition and rheological properties of the four cheese models*

Data are presented as means  $\pm$  the standard error. Different letters indicate significant differences between means ( $p < 0.05$ ). \*\*\* means  $< 0.0001$ , \*\*  $< 0.001$  and \*  $< 0.05$ . The test parameters for the Whipped product was different, so the results cannot be compared.

|                               | <b>Variables</b>                    | <b>p-value</b> | <b>Hard</b>                | <b>Soft</b>               | <b>Processed</b>          | <b>Whipped</b>   |
|-------------------------------|-------------------------------------|----------------|----------------------------|---------------------------|---------------------------|------------------|
| <b>Composition</b>            | <b>Protein (%)</b>                  |                | 24                         | 24                        | 24                        | 24               |
|                               | <b>Lipid (%)</b>                    |                | 20                         | 20                        | 20                        | 20               |
|                               | <b>Dry-matter (%)</b>               |                | 51                         | 51                        | 51                        | 51               |
| <b>Processing conditions</b>  | <b>Time of heat treatment (min)</b> |                | 35                         | 18                        | 17                        | 80               |
|                               | <b>Specific step of preparation</b> |                |                            |                           |                           | Foam             |
| <b>Rheological properties</b> | <b>Fracture force (N)</b>           | ***            | 108.25 $\pm$ 19.5 <i>a</i> | 15.65 $\pm$ 7.96 <i>b</i> | 8.88 $\pm$ 3.99 <i>b</i>  | 5.93 $\pm$ 1.34  |
|                               | <b>Adhesive force (N)</b>           | ***            |                            | -1.90 $\pm$ 0.85 <i>b</i> | -8.19 $\pm$ 4.13 <i>a</i> | -0.08 $\pm$ 0.02 |
|                               | <b>Springiness</b>                  | *              |                            | 0.28 $\pm$ 0.15 <i>b</i>  | 0.20 $\pm$ 0.11 <i>a</i>  | 0.71 $\pm$ 0.05  |

*Table S2: ANCOVA model coefficients for items of the food comfortability questionnaire by products.*

Only the items significantly affected by the oral health (stimulated salivary flow and/or dental status) were reported. Significant coefficients ( $p$ -value  $< 0.05$ ) were in bold. F: Fisher ratio; p: p-value; \*: p-value  $< 0.05$  \*\*: p-value  $< 0.001$ ;  $\mu$ : fixed effect; SFS: Stimulated Salivary Flow; Dent: Dental status (with satisfactory dentition as reference); Dent x SFS: interaction effect of the dental status and the stimulated salivary flow.

| Variables / Product               |                | Hard  |               |              | Soft  |        |              | Processed    |              |            | Whipped      |               |            |
|-----------------------------------|----------------|-------|---------------|--------------|-------|--------|--------------|--------------|--------------|------------|--------------|---------------|------------|
| <u>General comfort</u>            |                | SFS   | Dent          | Dent x SFS   | SFS   | Dent   | Dent x SFS   | SFS          | Dent         | Dent x SFS | SFS          | Dent          | Dent x SFS |
| Comfort                           |                | 0.00  | <b>4.78*</b>  | 0.16         | 2.41  | 0.13   | 0.73         | 2.54         | 1.20         | 3.15       | 0.62         | 1.05          | 1.53       |
|                                   |                | -0.61 | <b>-13.97</b> | 2.36         | -1.62 | 5.34   | -4.21        | 0.67         | 9.03         | -8.05      | 6.54         | 7.28          | -7.63      |
| Easy                              |                | 0.39  | 2.80          | 2.60         | 0.07  | 2.55   | 0.34         | 0.05         | 1.75         | 0.12       | 2.31         | <b>4.17*</b>  | 0.17       |
|                                   |                | -1.75 | -17.36        | 7.14         | -0.22 | -7.00  | 1.86         | -0.78        | -5.89        | 1.26       | 3.40         | <b>-11.71</b> | 2.13       |
| <u>Bolus formation</u>            |                |       |               |              |       |        |              |              |              |            |              |               |            |
| Incisor                           | F <sup>P</sup> | 0.99  | 1.25          | <b>4.32*</b> | 0.98  | 1.28   | 0.58         | 1.06         | 0.68         | 2.15       | 3.15         | 0.15          | 0.25       |
|                                   | μ              | -1.66 | -14.90        | <b>7.32</b>  | 0.11  | -0.66  | 1.52         | -0.42        | -7.52        | 3.66       | 6.38         | 2.71          | -2.75      |
| Molar                             | F <sup>P</sup> | 0.77  | 0.67          | <b>4.26*</b> | 1.37  | 0.31   | 0.19         | 0.90         | 0.04         | 1.96       | 1.35         | 0.36          | 0.39       |
|                                   | μ              | -1.60 | -11.74        | <b>6.11</b>  | 0.70  | -0.54  | 0.90         | -0.54        | -4.92        | 3.28       | 4.19         | 2.43          | -2.85      |
| Masticate                         | F <sup>P</sup> | 1.51  | 3.01          | 1.15         | 1.12  | 0.21   | 0.09         | 1.51         | 3.01         | 1.15       | <b>3.80*</b> | 0.95          | 0.08       |
|                                   | μ              | 0.66  | -11.73        | 4.06         | 1.99  | 2.59   | -0.91        | 0.66         | -11.73       | 4.06       | <b>4.54</b>  | -6.38         | 1.49       |
| Humidify                          | F <sup>P</sup> | 0.31  | <b>5.73*</b>  | 0.35         | 1.73  | 1.13   | 1.26         | 0.00         | 2.13         | 0.20       | 0.44         | <b>7.35**</b> | 1.22       |
|                                   | μ              | 3.33  | <b>-4.43</b>  | -2.81        | 5.42  | 4.13   | -4.80        | 1.20         | -1.80        | -1.85      | 5.67         | <b>-2.05</b>  | -6.10      |
| <u>Product texture attributes</u> |                |       |               |              |       |        |              |              |              |            |              |               |            |
| Sticky                            | F <sup>P</sup> | 0.54  | 1.17          | 0.27         | 0.06  | 3.00   | 1.15         | 1.51         | 0.19         | 0.04       | 0.72         | <b>4.54*</b>  | 0.17       |
|                                   | μ              | 3.14  | 9.45          | -2.90        | 2.05  | 11.45  | -3.96        | 3.53         | 3.42         | -1.02      | 3.24         | <b>14.98</b>  | -2.62      |
| Greasy                            | F <sup>P</sup> | 0.00  | 0.06          | 0.61         | 0.07  | 1.57   | 0.02         | 0.00         | <b>5.47*</b> | 2.81       | 0.59         | 0.05          | 2.45       |
|                                   | μ              | 1.64  | 6.98          | -3.74        | -0.63 | 5.98   | -0.73        | 3.30         | <b>21.91</b> | -8.07      | 1.75         | 12.32         | -7.17      |
| Dry                               | F <sup>P</sup> | 0.02  | 1.41          | 2.18         | 0.02  | 0.80   | 1.12         | 0.04         | 0.43         | 0.60       | 0.04         | <b>6.37*</b>  | 0.05       |
|                                   | μ              | 3.85  | 21.79         | -9.70        | -1.62 | -3.23  | 3.44         | -0.85        | -1.89        | 2.02       | 0.55         | <b>18.56</b>  | -1.72      |
| Dough                             | F <sup>P</sup> | 0.35  | 1.63          | 0.75         | 2.16  | 1.92   | 0.02         | 0.16         | 0.10         | 0.96       | 0.01         | <b>4.16*</b>  | 0.32       |
|                                   | μ              | 0.38  | 14.14         | -5.10        | 3.07  | 5.68   | -0.66        | 3.29         | 9.02         | -4.84      | -2.07        | <b>4.23</b>   | 3.45       |
| Firm                              | F <sup>P</sup> | 0.61  | 1.50          | 1.06         | 1.51  | 1.30   | <b>4.60*</b> | 0.18         | 1.84         | 2.18       | 1.57         | 0.36          | 2.03       |
|                                   | μ              | 0.27  | 13.67         | -5.36        | 1.61  | 18.00  | <b>-8.87</b> | 1.61         | 12.49        | -5.35      | -7.03        | -9.39         | 7.36       |
| Melting                           | F <sup>P</sup> | 0.02  | 1.70          | 0.18         | 0.30  | 0.03   | 1.67         | 0.02         | 0.30         | 1.04       | 2.66         | <b>7.21**</b> | 2.81       |
|                                   | μ              | -0.27 | -7.13         | 1.77         | -1.84 | -11.51 | 6.70         | 2.45         | 6.28         | -5.32      | 8.47         | <b>2.71</b>   | -7.94      |
| <u>Flavor attributes</u>          |                |       |               |              |       |        |              |              |              |            |              |               |            |
| Salty                             | F <sup>P</sup> | 0.01  | 0.58          | 0.21         | 0.81  | 1.26   | 0.12         | <b>5.35*</b> | 0.28         | 0.08       | 0.22         | 0.37          | 0.03       |
|                                   | μ              | 1.11  | 6.15          | -2.10        | -1.58 | 6.67   | -1.58        | <b>-5.85</b> | -0.22        | 1.28       | -1.53        | 0.84          | 0.75       |
| Sweet                             | F <sup>P</sup> | 12.88 | 0.00          | 0.79         | 1.52  | 3.41   | 1.06         | 0.20         | <b>4.79*</b> | 0.04       | 7.45         | 2.27          | 6.60       |
|                                   | μ              | 1.91  | -2.03         | 1.27         | 0.00  | 0.00   | 0.00         | 0.00         | <b>0.00</b>  | 0.00       | 0.00         | 0.00          | 0.00       |

*Table S3: Results from the questionnaire on the perception of food comfortability.*

The score ranges from 0 to 100 in all cases. For the questions on “general comfort” and “bolus formation” 0 indicates impossible and 100 indicates very easy. For the section “pain”, “product texture” and “flavor” 0 indicates not at all and 100 indicates extremely. Data are presented as mean values ± the standard deviation. The averages in bold are significantly different depending on the dental status

| Variables / Product               | Hard           |                |                |                | Soft           |                |                |                | Processed |  |              |  | Whipped |  |              |  |
|-----------------------------------|----------------|----------------|----------------|----------------|----------------|----------------|----------------|----------------|-----------|--|--------------|--|---------|--|--------------|--|
|                                   | Poor           |                | Satisfactory   |                | Poor           |                | Satisfactory   |                | Poor      |  | Satisfactory |  | Poor    |  | Satisfactory |  |
| <b>General comfort</b>            |                |                |                |                |                |                |                |                |           |  |              |  |         |  |              |  |
| Comfort                           | <b>64</b> ± 15 | <b>53</b> ± 23 | 78 ± 18        | 76 ± 15        | 81 ± 16        | 76 ± 15        | 52 ± 23        | 48 ± 18        |           |  |              |  |         |  |              |  |
| Easy                              | 79 ± 12        | 73 ± 18        | 93 ± 10        | 89 ± 11        | 92 ± 9         | 88 ± 14        | <b>73</b> ± 18 | <b>65</b> ± 17 |           |  |              |  |         |  |              |  |
| <b>Bolus formation</b>            |                |                |                |                |                |                |                |                |           |  |              |  |         |  |              |  |
| Incisor                           | <b>90</b> ± 11 | <b>88</b> ± 13 | 95 ± 7         | 97 ± 6         | 96 ± 6         | 95 ± 10        | 89 ± 19        | 89 ± 19        |           |  |              |  |         |  |              |  |
| Molar                             | <b>91</b> ± 10 | <b>89</b> ± 10 | 95 ± 7         | 96 ± 7         | 96 ± 8         | 96 ± 8         | 91 ± 14        | 89 ± 16        |           |  |              |  |         |  |              |  |
| Masticate                         | 88 ± 11        | 84 ± 14        | 93 ± 12        | 95 ± 7         | 95 ± 9         | 92 ± 14        | <b>84</b> ± 15 | <b>81</b> ± 20 |           |  |              |  |         |  |              |  |
| Humidify                          | <b>71</b> ± 14 | <b>63</b> ± 18 | 83 ± 15        | 80 ± 13        | 84 ± 14        | 80 ± 13        | <b>70</b> ± 19 | <b>59</b> ± 18 |           |  |              |  |         |  |              |  |
| <b>Product texture attributes</b> |                |                |                |                |                |                |                |                |           |  |              |  |         |  |              |  |
| Sticky                            | 22 ± 14        | 27 ± 22        | 24 ± 12        | 29 ± 13        | 37 ± 18        | 39 ± 17        | <b>27</b> ± 18 | <b>38</b> ± 24 |           |  |              |  |         |  |              |  |
| Greasy                            | 14 ± 14        | 15 ± 17        | 24 ± 13        | 29 ± 18        | <b>29</b> ± 15 | <b>38</b> ± 18 | 13 ± 14        | 13 ± 16        |           |  |              |  |         |  |              |  |
| Dry                               | 35 ± 20        | 41 ± 24        | 4 ± 10         | 6 ± 11         | 3 ± 9          | 5 ± 9          | <b>31</b> ± 23 | <b>47</b> ± 28 |           |  |              |  |         |  |              |  |
| Dough                             | 31 ± 18        | 37 ± 21        | 31 ± 14        | 36 ± 14        | 38 ± 18        | 39 ± 14        | <b>28</b> ± 19 | <b>38</b> ± 21 |           |  |              |  |         |  |              |  |
| Firm                              | 32 ± 19        | 37 ± 16        | <b>10</b> ± 14 | <b>13</b> ± 14 | 7 ± 12         | 11 ± 13        | 9 ± 19         | 11 ± 16        |           |  |              |  |         |  |              |  |
| Melting                           | 11 ± 15        | 6 ± 12         | 39 ± 18        | 38 ± 16        | 43 ± 17        | 40 ± 18        | <b>17</b> ± 17 | <b>7</b> ± 16  |           |  |              |  |         |  |              |  |
| <b>Flavor attributes</b>          |                |                |                |                |                |                |                |                |           |  |              |  |         |  |              |  |
| Sweet                             | 1 ± 4          | 1 ± 6          | 0 ± 0          | 3 ± 8          | <b>0</b> ± 0   | <b>4</b> ± 10  | 0 ± 0          | 2 ± 7          |           |  |              |  |         |  |              |  |
